# Supplementary material for: Signatures of tumor-associated macrophages correlate with treatment response in ovarian cancer patients
Source: Aging (Albany NY). 2024 Jan 3;16(1):207–25. doi: 10.18632/aging.205362 (PMC10817412; doi:10.18632/aging.205362)
Supplement: Supplementary Figures [file aging-16-205362-s001.pdf]

SUPPLEMENTARY FIGURES

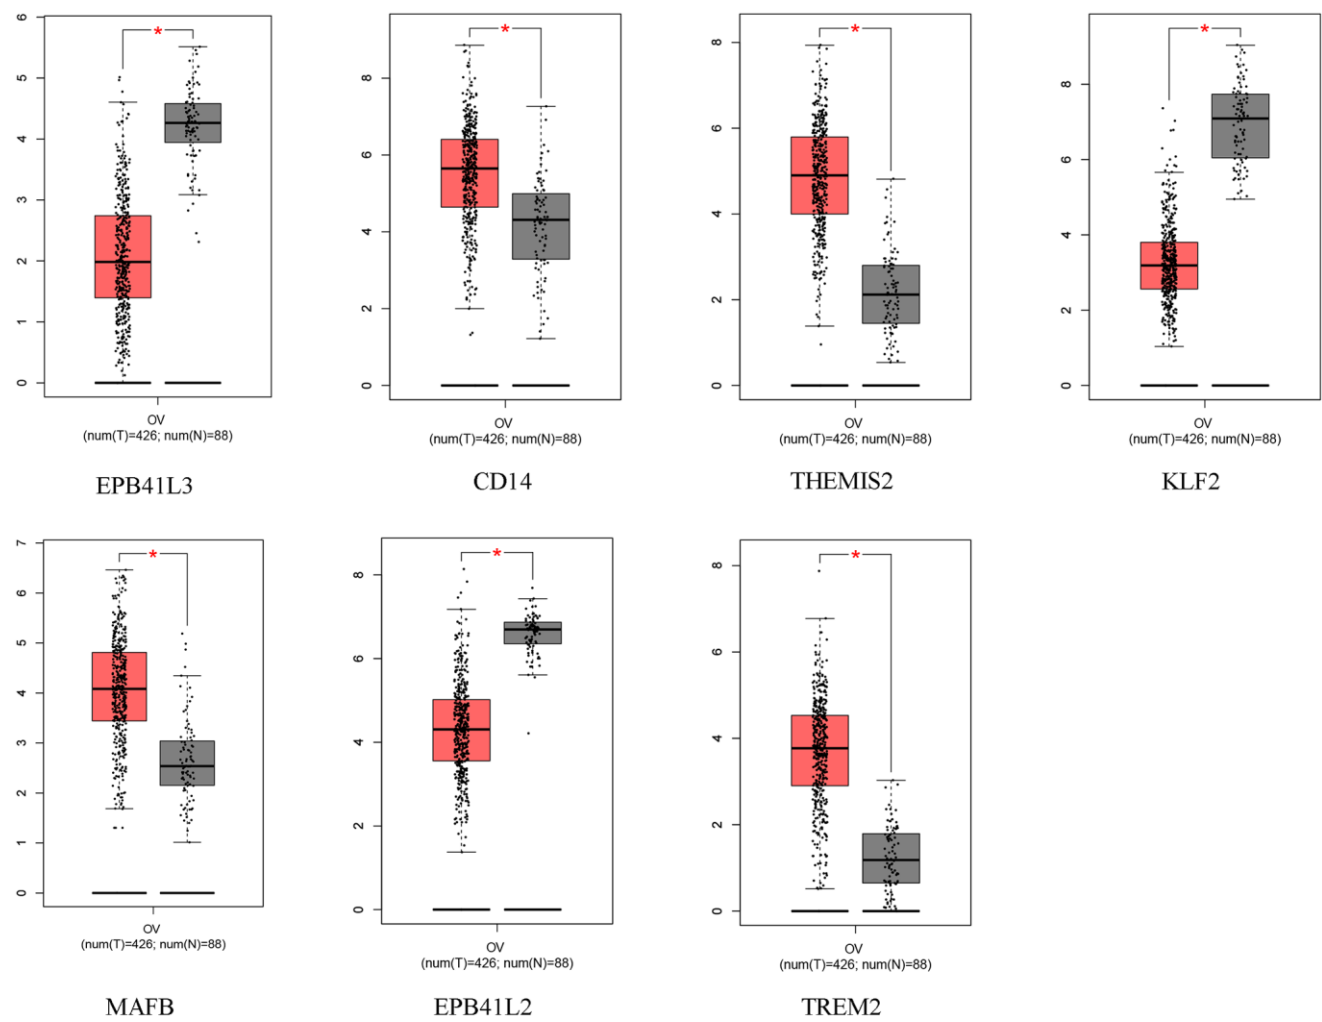

Supplementary Figure 1. Gene expression levels of GEPIA2-based key TMAGs in ovarian cancer and normal.

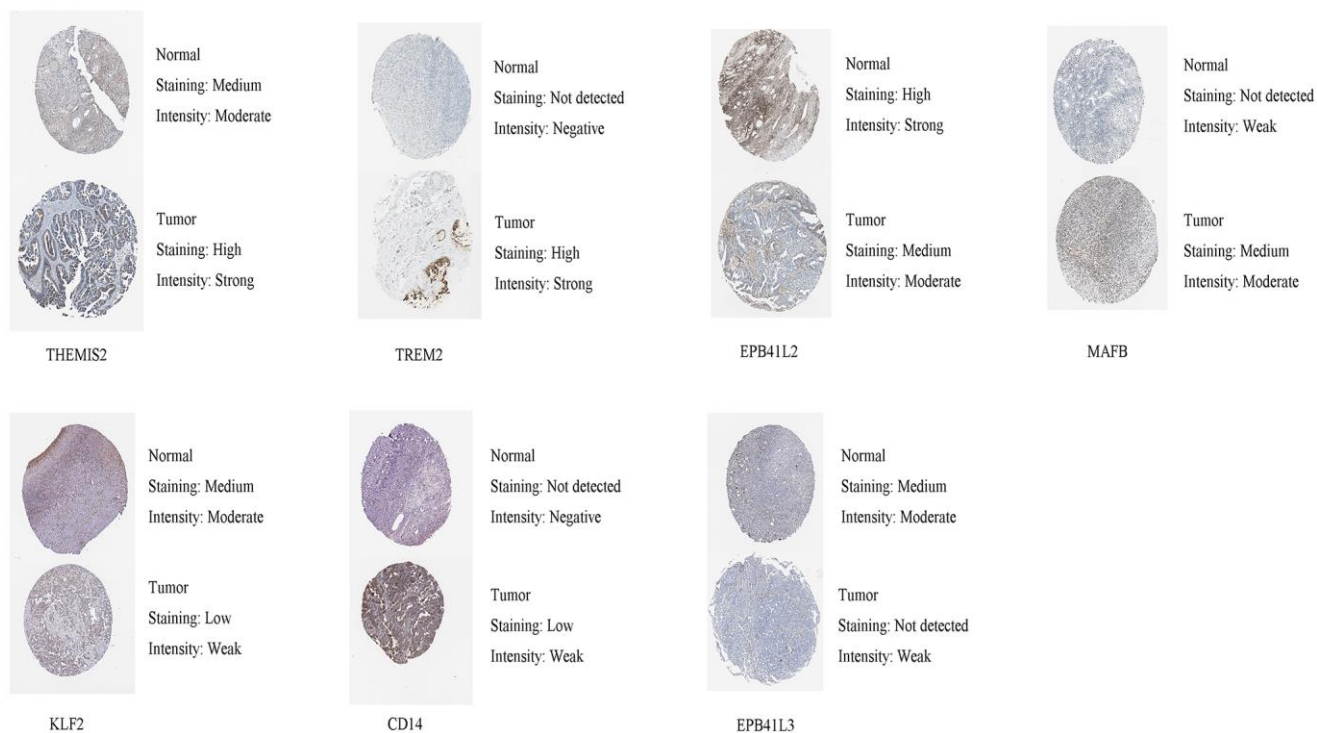

**Supplementary Figure 2. Key TMAGs protein expression levels in ovarian cancer and normal. Figure modified from HPA.**

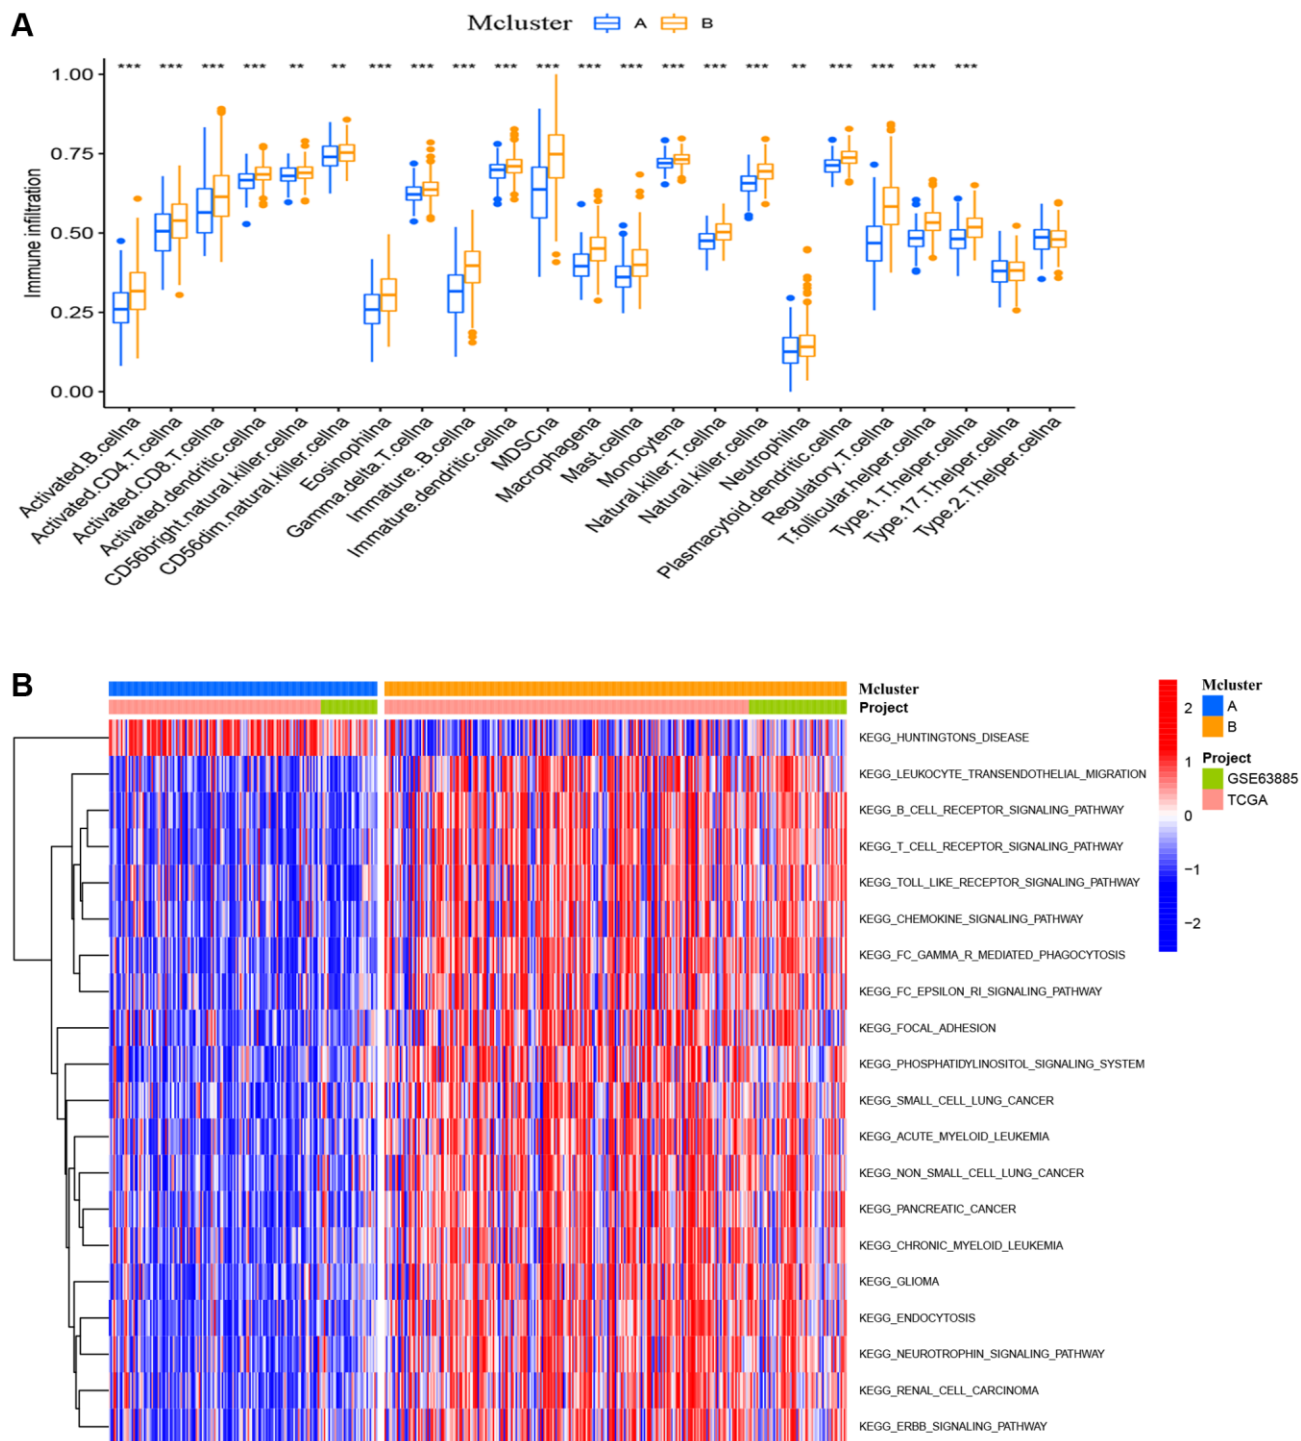

**Supplementary Figure 3. Differential identification between subtypes.** (A) Analysis of immune infiltrating cells between MCluster A and MCluster B. (B) Heat mapping was used to visualize the biological process by GSVA analysis in the 2 clusters. \* $P < 0.05$ , \*\* $P < 0.01$ , and \*\*\* $P < 0.001$ .
